# Integrated Care Systems

*Psychiatric News* features highly informative content on the emerging practice model of integrated care.

Learn about:

- Predominant models of integrated care and the role psychiatrists play
- Working in integrated care settings
- Payment and delivery models
- APA resources on integrated care and delivery systems initiatives

For new psychiatrists entering the field, understanding the key role of systems of care has never been more important. Research published each month in *Psychiatric Services* will help residents play a vital role in the systems of care where they work, which is why the American Psychiatric Association provides psychiatric residents who are APA Members-in-Training full-text online access to *Psychiatric Services* content as a benefit.

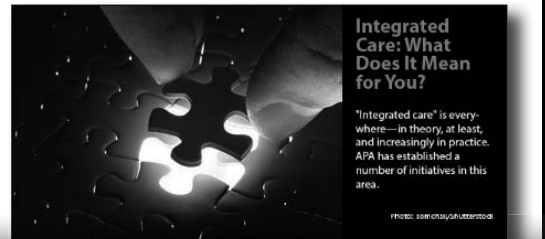

psychiatryonline DSM Library Books Journals Topics APA Guidelines CME & Self-Assessment News For Patients My POL Search Psych

## PSYCHIATRIC NEWS

From The American Psychiatric Association

  Advanced Search

About Content Archive Send Letter to the Editor Jobs/Classifieds Issue Alert Sign Up Contact Us

Home Clinical & Research Professional Government & Legal In the Community APA & Meetings From the Press

### Professional News

September 20, 2013 | DOI: 10.1176/appi.pn.2013.IC\_1

## Integrated Care: What Does It Mean for You?

Print E-mail Share Reprints

"Integrated care" is everywhere—in theory, at least, and increasingly in practice. The concept is a feature of the delivery-system improvements in the new health care reform law, and policymakers and many clinicians have converged on the idea that general medical and behavioral health services should be brought together in a patient-centered manner. Today, a small but dedicated and growing cadre of psychiatrists is advancing the cause of integrated care and the participation of psychiatrists in collaborative-care models.

Integrated care "is the right thing to do to improve the care and quality of life for people we take care of."

APA has established a number of initiatives in this area, headed up by the Work Group on Integrated Care of the Council on Healthcare Systems and Financing, chaired by Lori Raney, M.D., medical director of Axis Health System in Durango, Colo., and the Board of Trustees Health Care Reform Strategic Action Work Group, chaired by Howard Goldman, M.D., director of the Network on Mental Health Policy Research (funded by the MacArthur Foundation) and editor of the APA journal *Psychiatric Services*. Work group members include Jürgen Unützer, M.D., who is director of the Center for Advancing Integrated Mental Health Solutions (AIMS) at the University of Washington and one of the pioneers of integration. Along with Wayne Katon, M.D., Unützer began developing models in integrating mental health and primary care and testing them in diverse primary care settings across the country. Previously working on these issues was the APA Board of Directors' Work Group on Psychiatry and Healthcare Reform, chaired by Paul Summergrad, M.D., past-president and chair of psychiatry at Tufts University.

Integrated care system is a new opportunity for psychiatrists—another option on which they can use their license to care for people—but it is not a requirement, and it is not a specialty. Moreover, psychiatrists can work part time in an integrated care setting, maintaining whatever kind of traditional inpatient or outpatient practice they wish (see question 6). There are degrees of integrated care ranging from the original model of general medical and mental health services are offered in the same location; to a model of integrated care—where a psychiatrist working in consultation with other specialists to manage the behavioral health of a defined population of patients (sometimes referred to as "collaborative care," and the two terms—collaborative care—are often used interchangeably. However, for the purposes of this newsletter, the term "integrated care" will be used.

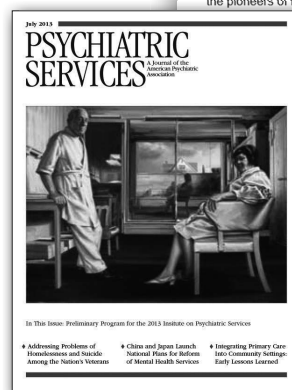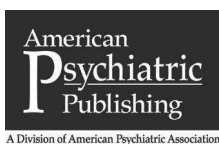

psychnews.psychiatryonline.org

www.appi.org • 1-800-368-5777 • Email: appi@psych.org

Priority Code AH1329

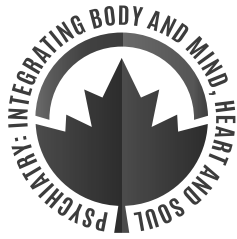

# AMERICAN PSYCHIATRIC ASSOCIATION 168<sup>TH</sup> ANNUAL MEETING

Toronto, Canada • May 16-20, 2015

Join colleagues from across the U.S. and around the world for the psychiatry event of the year!

## Why You Should Attend:

- ▶ Discover cutting-edge science and new therapies.
- ▶ Learn from renowned leaders in science and health policy.
- ▶ Connect with your peers and expand your professional network.
- ▶ Earn your annual licensure CME credit at one meeting!
- ▶ Explore the Exhibit Hall for innovative treatment options and new technologies.

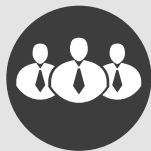

**14,000**  
Attendees

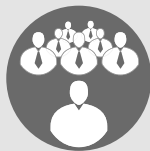

**400**  
Scientific Program  
Sessions

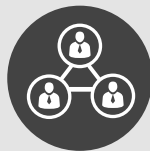

**200**  
Exhibitors

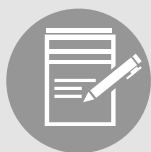

**42**  
Courses

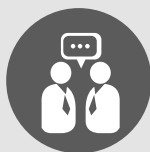

**Up to 50**  
CMEs\*

*\*The APA designates this live activity, the 168th Annual Meeting, for a maximum of 50 AMA PRA Category 1 Credits™.*

 Join: #APAAM15

To register online, visit [psychiatry.org/annualmeeting](http://psychiatry.org/annualmeeting)

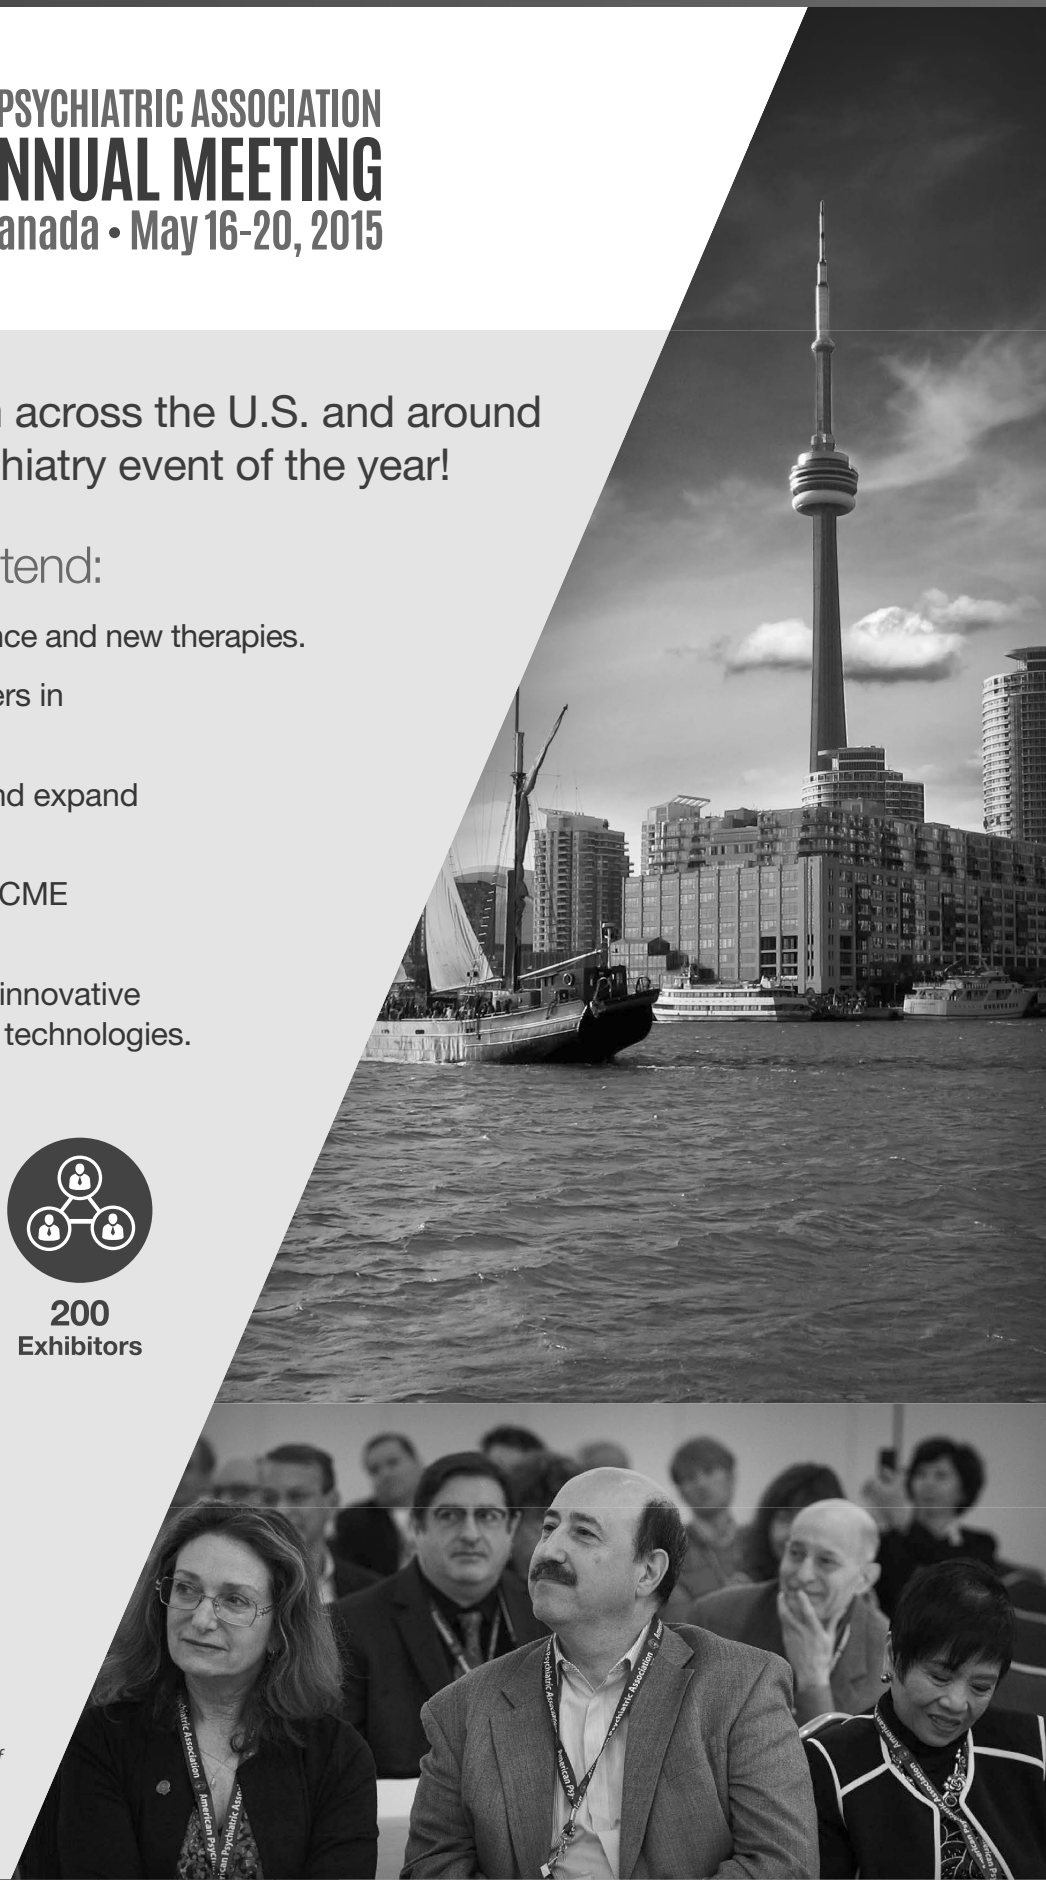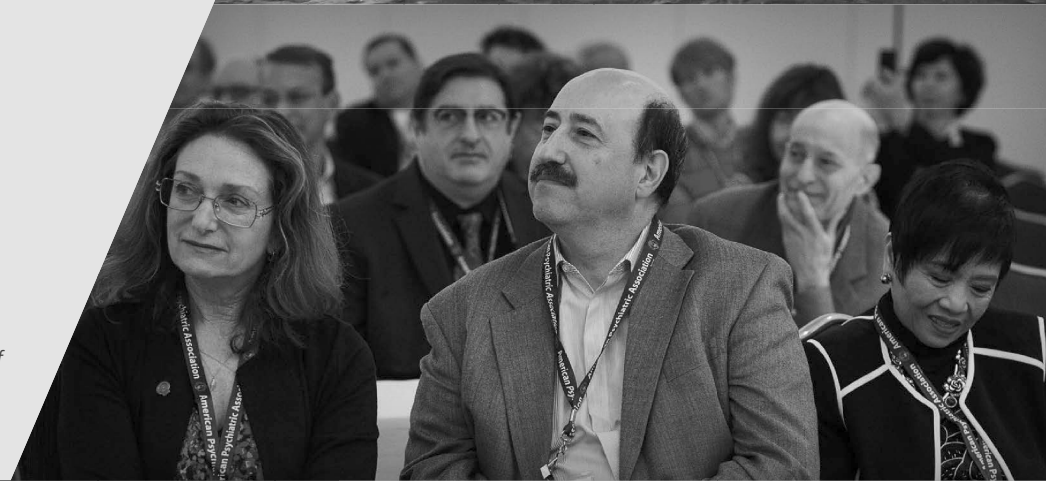

**Emory University  
Faculty Appointment  
ER Psychiatric Attending**

Emory University School of Medicine, Department of Psychiatry and Behavioral Sciences in Atlanta, Georgia is seeking qualified candidates at the Assistant and/or Associate Professor (M.D.) rank to provide clinical services in a newly expanded psychiatric emergency and crisis services program. The successful candidate should be board eligible or board certified in Psychiatry with a particular interest in emergency psychiatry. The successful candidate would join our Behavioral Health team at Grady Memorial Hospital treating mentally ill adults in the psychiatric emergency and crisis units. The successful candidate will be able to perform assessments, formulate treatment plans, implement treatments and evaluate progress of those interventions. This position will work in the Grady psychiatric emergency room and crisis intervention unit. The applicant will have the opportunity to supervise residents and students, as well as participate in relevant clinical research. It is also expected that physicians model leadership to Grady staff and promote a culture of a high performing team that works both independently and together to efficiently and effectively meet patient needs. The institution offers a nationally competitive salary commensurate with experience.

Send letter of interest and CV to:

**Gray Norquist, MD, MSPH**  
[grayson.norquist@emory.edu](mailto:grayson.norquist@emory.edu) and

[https://sjobs.brassring.com/1033/ASP/TG/cim\\_jobdetail.asp?  
partnerid=25066&siteid=5449&areq=50184br](https://sjobs.brassring.com/1033/ASP/TG/cim_jobdetail.asp?partnerid=25066&siteid=5449&areq=50184br)

"EMORY UNIVERSITY IS AN EQUAL OPPORTUNITY/AFFIRMATIVE ACTION/DISABILITY/VETERAN EMPLOYER."

# Our work matters

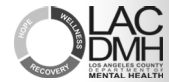

"At the end of the day, when you work with the DMH... your job is rewarding, you're helping the people who need it the most."

*Sarjack Mehta, MD  
General Psychiatrist*

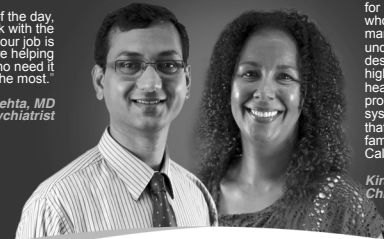

"DMH provides support for children and families who are often marginalized and underserved. Everyone deserves access to high quality mental health services, & I'm proud to be part of a system that is making that possible for families in Southern California."

*Kira William, MD  
Child Psychologist*

Join the largest, most dynamic mental health department in the nation. We are creating the future of mental health services, and we are seeking physicians who are ready to join our team and push the boundaries of traditional community practice.

To learn more about employment as a psychiatrist with the Los Angeles County Department of Mental Health, including salary and benefits, please visit:

[www.psychiatristjobs.la](http://www.psychiatristjobs.la)

**Psychiatric Services** (ISSN 1075-2730; online version, 1557-9700) is published monthly by the American Psychiatric Association, editorial and executive office, 1000 Wilson Blvd., Suite 1825, Arlington, VA 22209-3901. Copyright © 2015 by the American Psychiatric Association. Printed in U.S.A. Periodicals postage paid at Arlington, VA, and at additional mailing offices. POSTMASTER: Send address changes to **Psychiatric Services, 1000 Wilson Blvd., Suite 1825, Arlington, VA 22209-3901.**

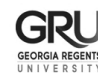

Medical College  
of Georgia

The Department of Psychiatry and Health Behavior at the Medical College of Georgia at Georgia Regents University (GRU) now seeks BC/BE general and forensic psychiatrists to lead the expansion of the public psychiatry partnership with the Georgia Department of Behavioral Health and Developmental Disabilities. Positions will manage psychiatric medical care at East Central Regional Hospital (ECRH)-Augusta (located only five miles from the medical school campus), a GRU teaching facility with a 90-bed psychiatric facility, 71 forensic beds and a developmental disabilities facility caring for 200 individuals. Faculty positions at will have the opportunity to teach or conduct research at the main medical school campus.

Faculty positions at ECRH will enjoy all the rights and privileges of a full-time faculty appointment, including a faculty benefits package that surpasses all expectations.

Augusta, home of the Master's golf tournament and a charming Southern city, is a superb place to live! Low cost of living, close to Georgia/Carolina mountains and Georgia/Florida coast.

Salary and fringe benefits are highly competitive.

**Job Qualifications:**

Qualifications include licensure to practice medicine at a state institution or in the state of Georgia as provided by state laws is required. The final candidate will be required to provide proof of completed academic degree in the form of an original transcript. Preferred qualifications include experience in treating persons with serious and persistent mental illnesses, and completed Residency in Psychiatry.

**To Apply:**

Visit the GRU website at <http://www.gru.edu/jobs/faculty> - Job ID number 5770 and position number 00009882 to submit your application and resume. Georgia Regents University of Augusta is an equal employment, equal access, and equal education opportunity and affirmative action institution. It is the policy of the University to recruit, hire, train, promote and educate persons without regard to age, disability, gender, national origin, race, religion, sexual orientation or veteran status.

# Understanding Mental Disorders

## Your Guide to DSM-5®

American Psychiatric Association

**A consumer guide for anyone who has been touched by mental illness!**

Most of us know someone who suffers from a mental illness. This book helps those who may be struggling with mental health problems, as well as those who want to help others achieve mental health and well-being.

Based on the DSM-5®, **Understanding Mental Disorders** provides valuable insight on what to expect from an illness and its treatment—and will help readers recognize symptoms, know when to seek help, and get the right care. Featured disorders include depression, schizophrenia, ADHD, autism spectrum disorder, posttraumatic stress disorder, and bipolar disorder, among others.

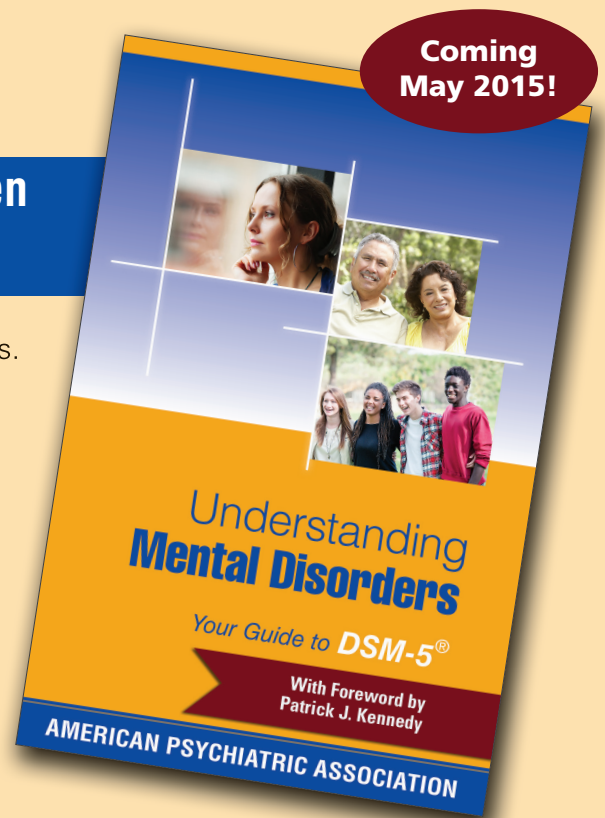

“This simple, user-friendly guide is clear and informative. The format makes it easy to look up information about specific disorders.”—*Alies Muskin, Executive Director, Anxiety and Depression Association of America*

“DSM-5 sounds mysterious or technical to many people. This guide dissolves the mystery and explains psychiatric diagnoses in readily understandable terms.”—*Mary Giliberti, Executive Director, National Alliance on Mental Illness*

“*Understanding Mental Disorders* is an important resource that highlights in a balanced, sensitive way the multifaceted nature of mental disorders.”—*Allen Doederlein, President, Depression and Bipolar Support Alliance*

“*Understanding Mental Disorders* is a consumer-friendly guide to understanding the full array of mental health concerns and conditions that affect so many of us, and to understanding the range of treatments that can be effective in addressing them.”—*Paul Gionfriddo, President and CEO, Mental Health America*

For more resources and information, visit [www.psychiatry.org/UnderstandingMentalDisorders](http://www.psychiatry.org/UnderstandingMentalDisorders)

**2015 • 370 pages • ISBN 978-1-58562-491-1 • Paperback • \$24.95 • Item #62491**

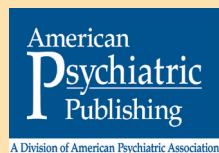

Order Online: [www.appi.org](http://www.appi.org)

American Psychiatric Publishing  
A Division of American Psychiatric Association  
Phone: 703-907-7322 • Toll Free: 1-800-368-5777  
Email: [appi@psych.org](mailto:appi@psych.org)

20% Discount for American Psychiatric Association Members!  
25% Discount for APA Resident-Fellow Members  
AH1512A
