# Psychiatric Services

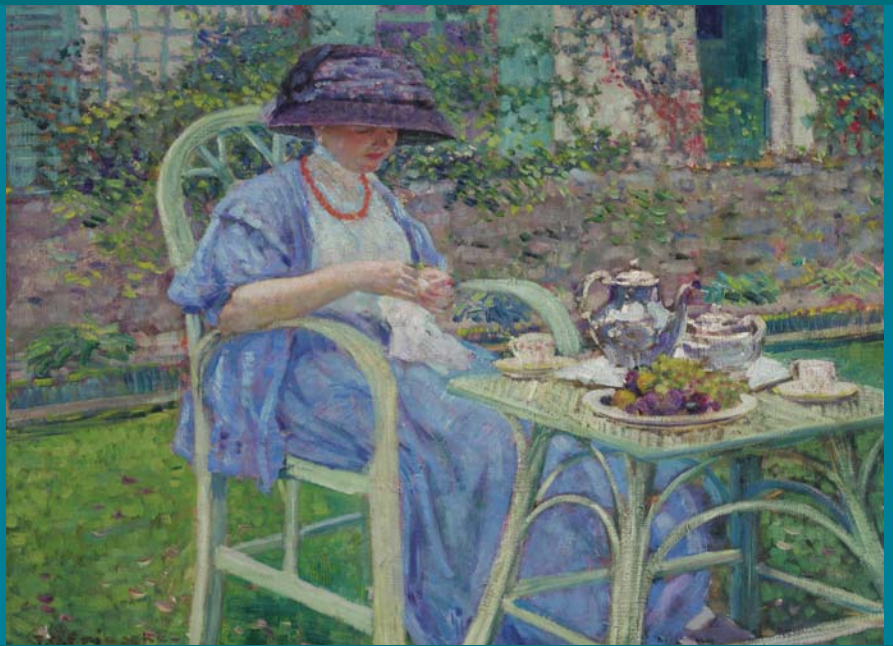

Improved patient outcomes with better continuity of care? A literature review

Factors that promote engagement in peer-run organizations: two surveys

Costs and benefits of reducing racial-ethnic disparities in mental health care

Hiring veterans as peer and vocational rehabilitation specialists: a national study
