Exceptional Careers with  
**THE SALARY  
YOU  
DESERVE**

## Staff Psychiatrist

**\$233,196 - \$287,592** annual salary

Welcome Bonus of **\$10,000**

J-1 Waiver & H-1B Visa Sponsorship

**Residents and fellows,  
plan a rewarding career path with us  
and secure your new job now!**

Enjoy the advantages of a 40-hour work week, a highly competitive salary, a retirement plan that vests in only five years, and all of the security and benefits that come with State employment. We have special opportunities available in Northern California at **High Desert State Prison** and **Pelican Bay State Prison**.

Both institutions are located among the majestic beauty experienced only in Northern California. Explore old growth redwoods along the coast near Pelican Bay State Prison or find adventure along the Sierra Nevada Mountains in High Desert State Prison's Susanville named in *Outdoor Life* as one of their "Top 200 Towns."

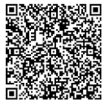

To learn more about our great careers, please contact

**Dr. John Lindgren** at **209.351.7225** or **Psychiatry.Jobs@cdcr.ca.gov**.

For more information, please visit **www.ChangingPrisonHealthCare.org**

California Department of Corrections & Rehabilitation

Ad#S4-HDSP/PBSP

EOE

## There's So Much More to **PSYCHIATRIC SERVICES** Than Meets the Page!

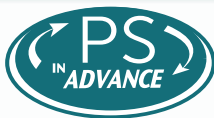

### Psychiatric Services in Advance

#### Latest research reports!

#### How to Increase Use of Evidence in Mental Health Policy

This literature review examined the effectiveness of strategies to increase use of research in the development of mental health policies.

#### Service Use Among Lesbian, Gay, and Bisexual Older Adults

Data from a 2011 community survey in New York City indicated that LGB older adults were more likely than heterosexuals to use mental health services—an association not explained by indicators of general medical, mental, or behavioral health.

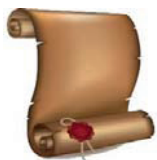

#### Revisit the field's rich history!

#### 50 Years Ago in *Psychiatric Services*

- Planning Comprehensive Community Services
- Use of Computers in Patient Care
- Design of a Brief Form for Psychotherapy Data

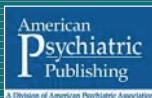

**ps.psychiatryonline.org**

www.appi.org • 1-800-368-5777 • Fax: 703-907-1091 • Email: appi@psych.org

Priority Code AH1520
